# Supplementary material for: The Performance of 2023 American College of Rheumatology (ACR) / European Alliance of Associations for Rheumatology (EULAR) Antiphospholipid Syndrome Classification Criteria in a Real-World Rheumatology Department
Source: PubMed Central journal article supplement — Mediterr J Hematol Infect Dis. 2024 Nov 1;16(1):e2024074. doi: 10.4084/MJHID.2024.074 (PMC11556423; doi:10.4084/mjhid.2024.074), 2024-11-01
Supplement: MJHID-16-1-e2024074supplementary.pdf [file MJHID-16-1-e2024074supplementary.pdf]

**Original article**

**The Performance of 2023 American College of Rheumatology (ACR) / European Alliance of Associations for Rheumatology (EULAR) Antiphospholipid Syndrome Classification Criteria in a Real-World Rheumatology Department**

**Supplementary data**

**Supplemental Table S1.** Patients who do not meet the 2023 ACR/EULAR APS Criteria and Revised Sapporo APS Criteria.

|           | <b>Clinical Features</b>                                                                            | <b>Laboratory features</b>                         | <b>2023 ACR/EULAR APS Criteria Status</b>            | <b>Revised Sapporo APS Criteria Status</b> |
|-----------|-----------------------------------------------------------------------------------------------------|----------------------------------------------------|------------------------------------------------------|--------------------------------------------|
| Patient 1 | Arterial thrombosis without a high-risk CVD profile                                                 | Positive LAC (single – one time)                   | The laboratory domain score is inadequate            | Lack of laboratory criteria                |
| Patient 2 | Arterial thrombosis without a high-risk CVD profile                                                 | No presence of an aPL antibody                     | The laboratory domain score is inadequate            | Lack of laboratory criteria                |
| Patient 3 | Venous thromboembolism without a high-risk VTE profile                                              | Positive LAC (single – one time)                   | The laboratory domain score is inadequate            | Lack of laboratory criteria                |
| Patient 4 | Venous thromboembolism without a high-risk VTE profile                                              | Presence of low titer aCL IgG                      | The laboratory domain score is inadequate            | Lack of laboratory criteria                |
| Patient 5 | Venous thromboembolism with a high-risk VTE profile and One early fetal (<16w) death without PEC/PI | Positive LAC (single – one time)                   | Clinical and laboratory domain scores are inadequate | Lack of laboratory criteria                |
| Patient 6 | Venous thromboembolism with a high-risk VTE profile                                                 | No presence of an aPL antibody                     | Clinical and laboratory domain scores are inadequate | Lack of laboratory criteria                |
| Patient 7 | PEC with severe features (<34w) without fetal death                                                 | Presence of low titer aCL IgG                      | The laboratory domain score is inadequate            | Lack of laboratory criteria                |
| Patient 8 | None                                                                                                | Presence of thrombocytopenia and low titer aCL IgM | Clinical and laboratory domain scores are inadequate | Lack of clinical and laboratory criteria   |

aCL; anticardiolipin antibody, APS; antiphospholipid syndrome, aPL; antiphospholipid, CVD; cardiovascular disease, LAC; lupus anticoagulant, PEC, preeclampsia, VTE; venous thromboembolism.
